# Supplementary material
Source: PubMed Central journal article supplement (PMC8919706)
Supplement: NIHMS1778872-supplement-1.pdf [file NIHMS1778872-supplement-1.pdf]

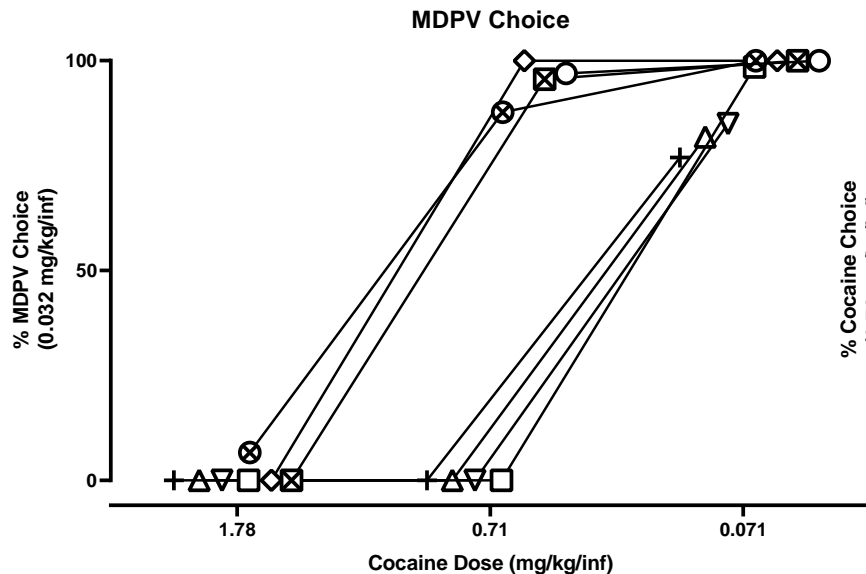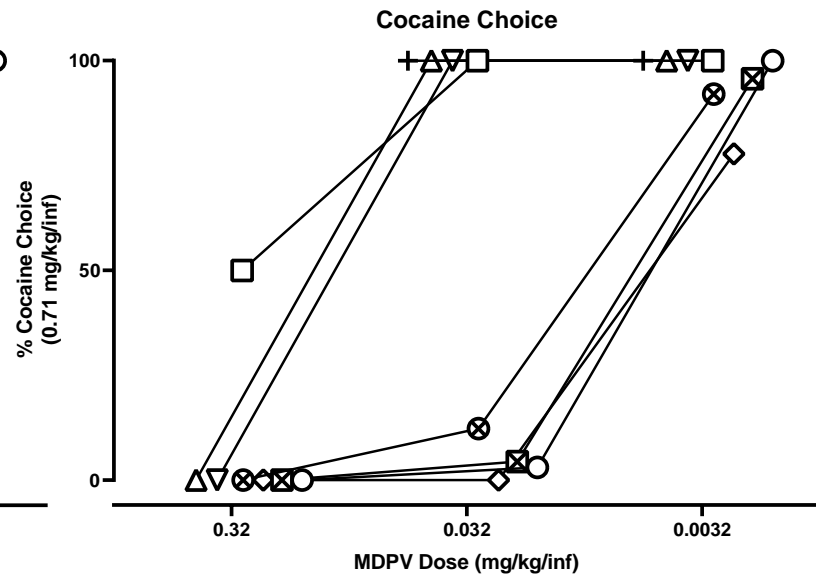

**Supplemental Figure 1: Percent choice of 0.032 mg/kg/infusion of MDPV as a function of concurrently available cocaine dose (left). Percent choice of 0.71 mg/kg/infusion of cocaine as a function of concurrently available MDPV dose (right). Each symbol represents an individual subject.**
